# Supplementary material
Source: PubMed Central journal article supplement (PMC6738186)
Supplement: jin-0011-0347-s01.pdf [file jin-0011-0347-s01.pdf]

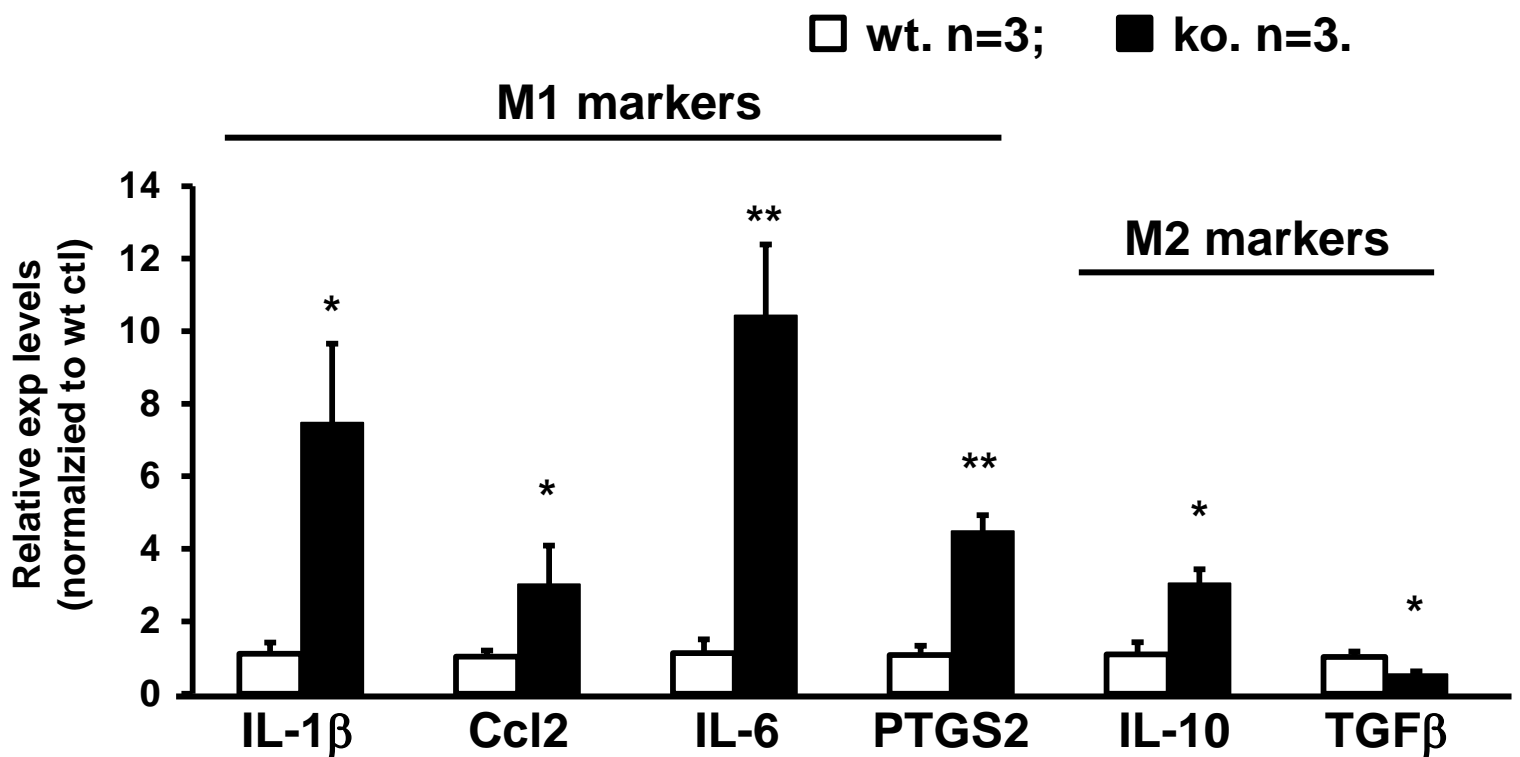

**Fig. S1. qRT-PCR analysis shows that inactivation of miR-183/96/182 results in simultaneous upregulation of multiple M1 markers (IL-1, Ccl2, IL-6 and PTGS2) marker as well as M2 markers, IL-10; while decreases expression of TGF $\beta$ , another M2 markers.**
